# Supplementary material for: Mutations of SARS-CoV-2 nsp14 exhibit strong association with increased genome-wide mutation load
Source: PubMed Central journal article supplement (PMC7560320; doi:10.7717/peerj.10181), 2020-10-12
Supplement: peerj-08-10181-s001.pdf [file peerj-08-10181-s001.pdf]

**Supplementary Figure 1**

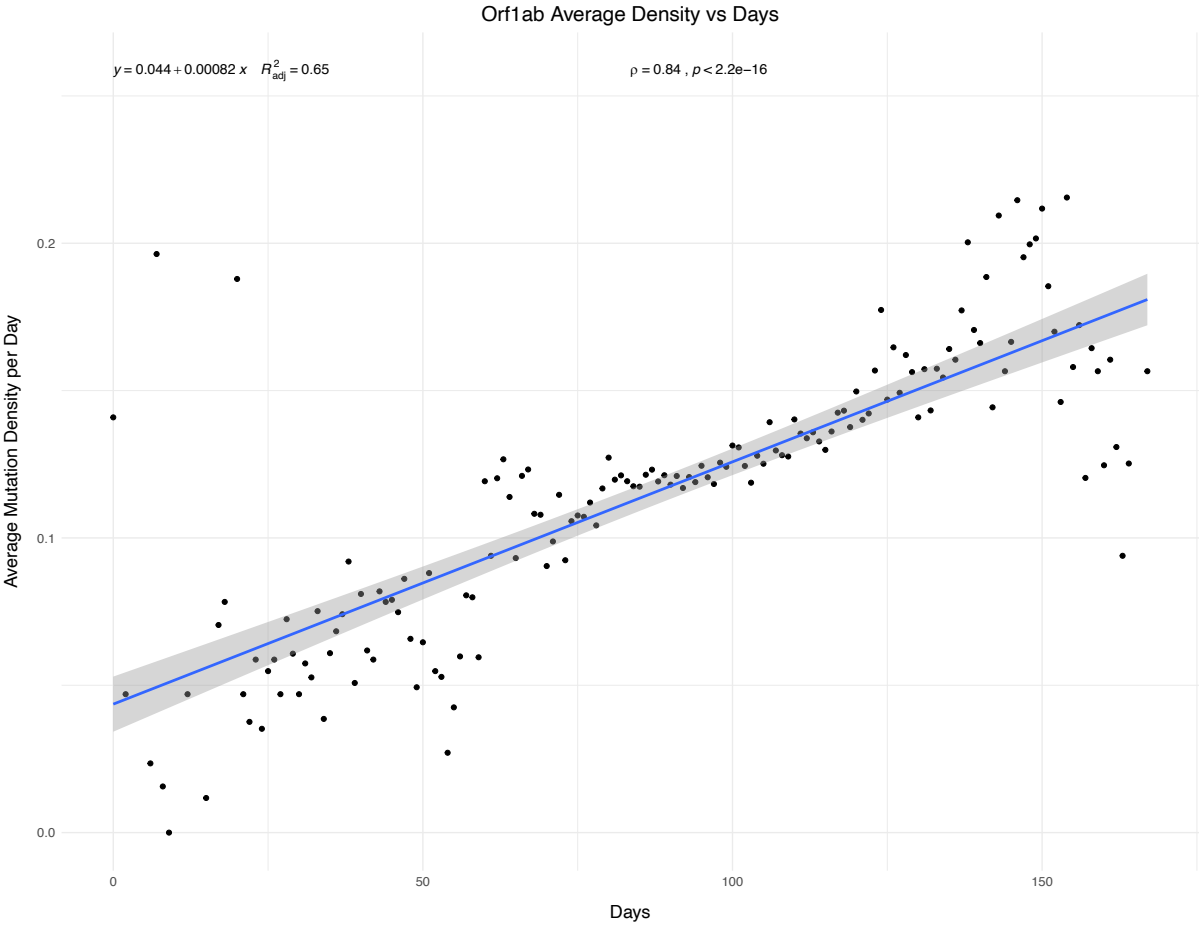

**Supplementary Figure 1. The distribution of daily mutation density averages in Orf1ab gene.** Correlation scores are calculated using Spearman rank correlation.

### Supplementary Figure 2

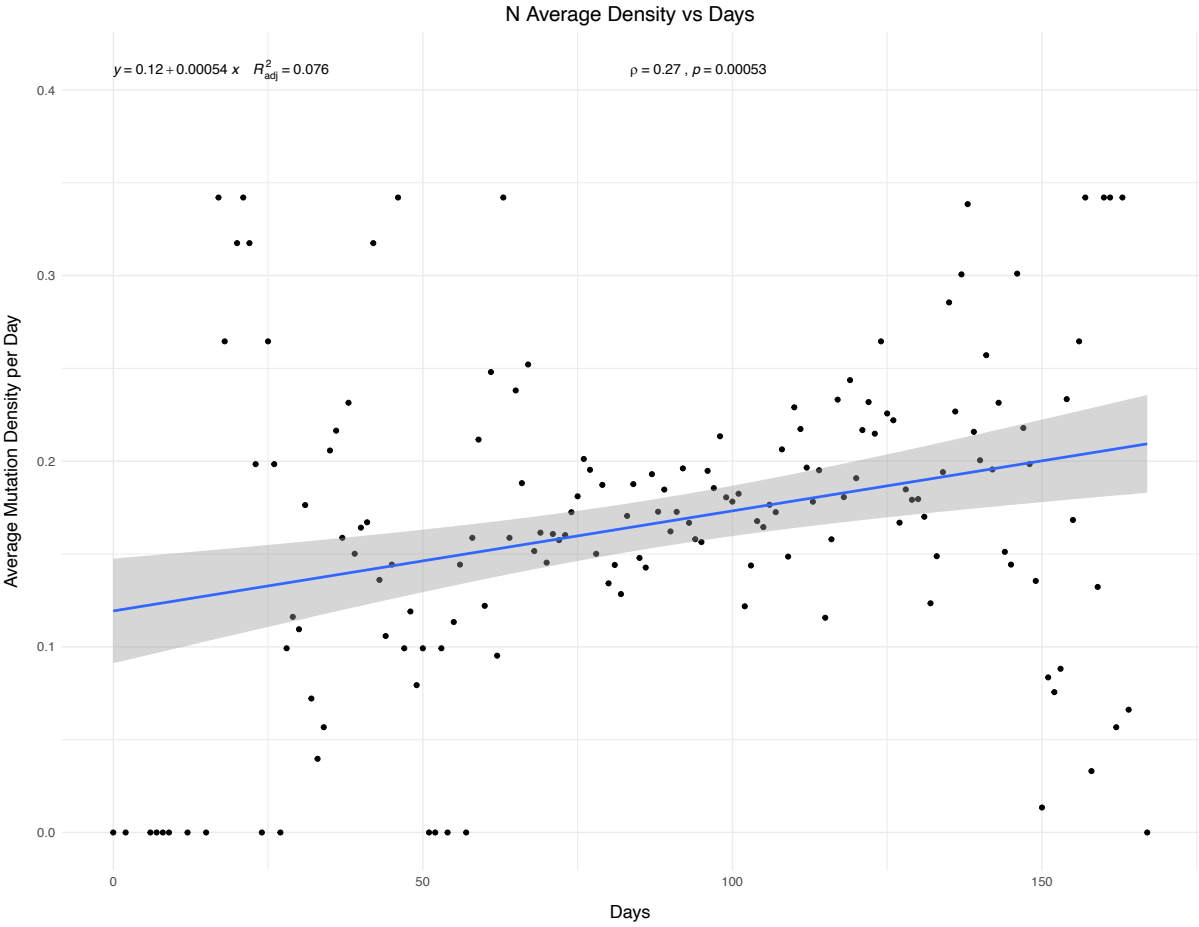

**Supplementary Figure 2. The distribution of daily mutation density averages in N gene.**  
Correlation scores are calculated using Spearman rank correlation.

### Supplementary Figure 3

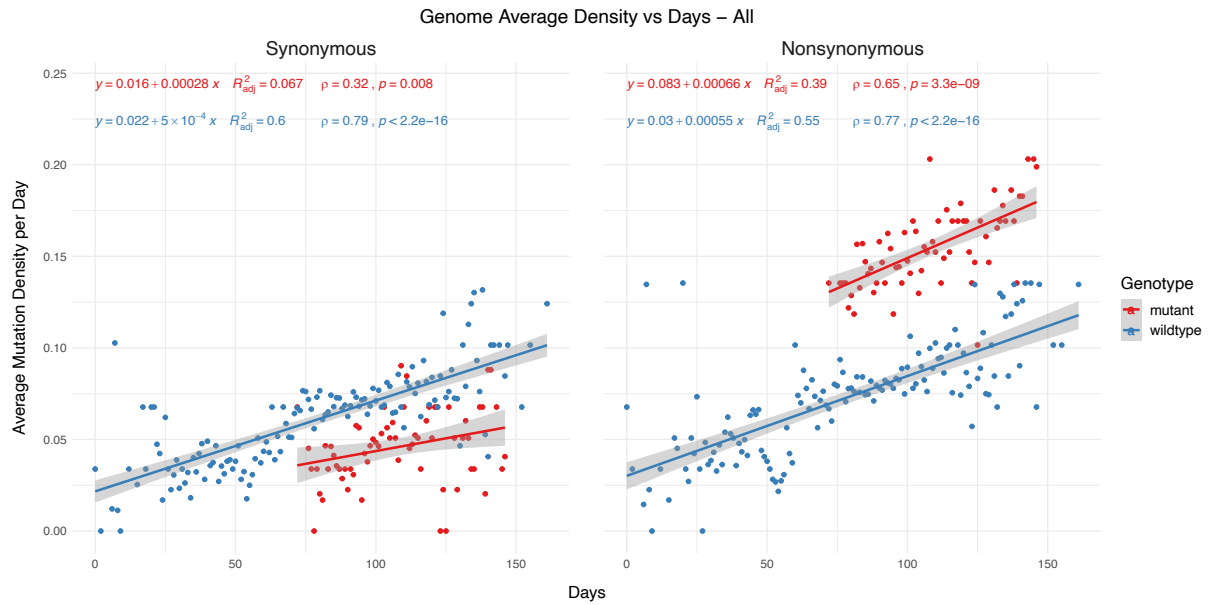

**Supplementary Figure 3. The distribution of synonymous and nonsynonymous mutations in isolates carrying 11916C>T mutation compared to wildtype isolates.**

Correlation scores are calculated using Spearman rank correlation.

## Supplementary Figure 4

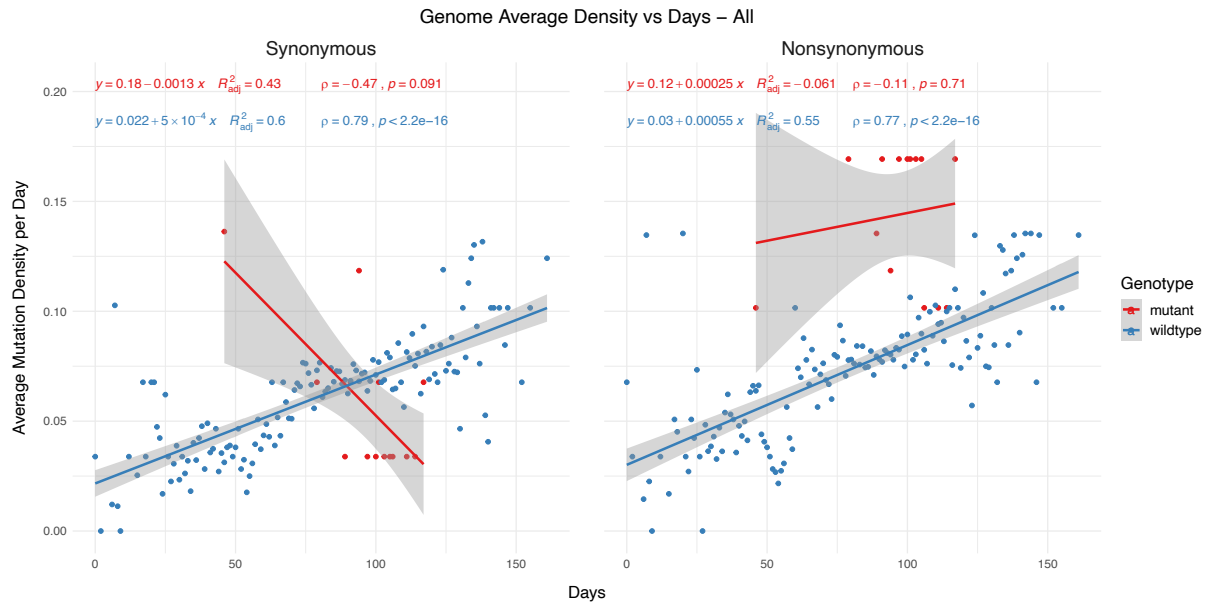

**Supplementary Figure 4. The distribution of synonymous and nonsynonymous mutations in isolates carrying 12073C>T mutation compared to wildtype isolates.**

Correlation scores are calculated using Spearman rank correlation.

## Supplementary Figure 5

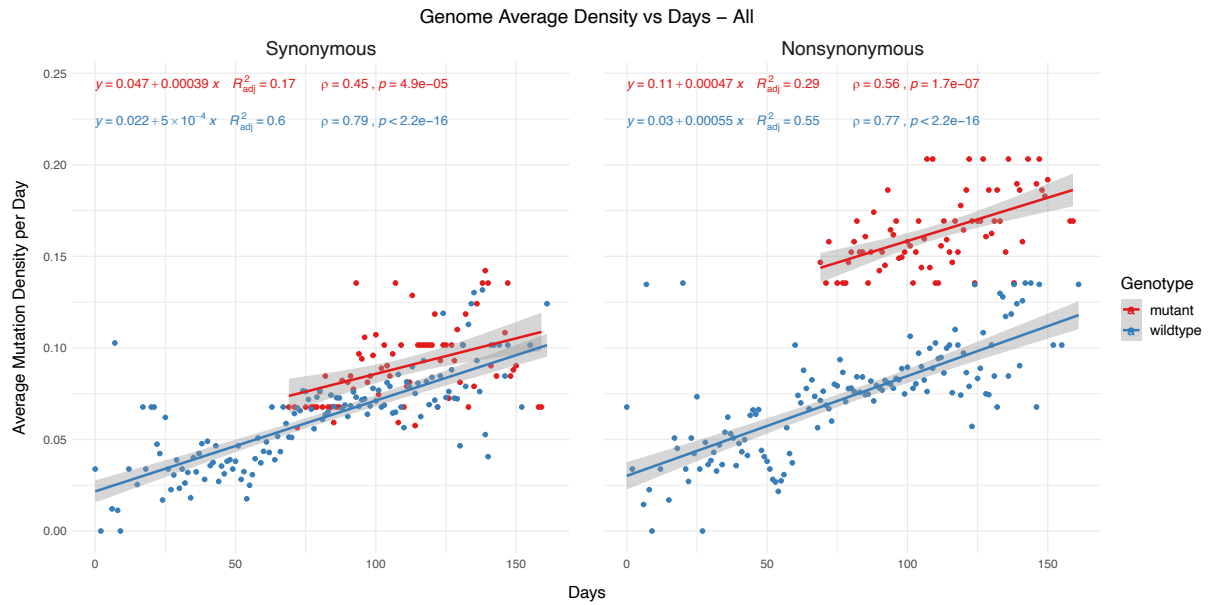

**Supplementary Figure 5. The distribution of synonymous and nonsynonymous mutations in isolates carrying 13536C>T mutation compared to wildtype isolates.**

Correlation scores are calculated using Spearman rank correlation.

## Supplementary Figure 6

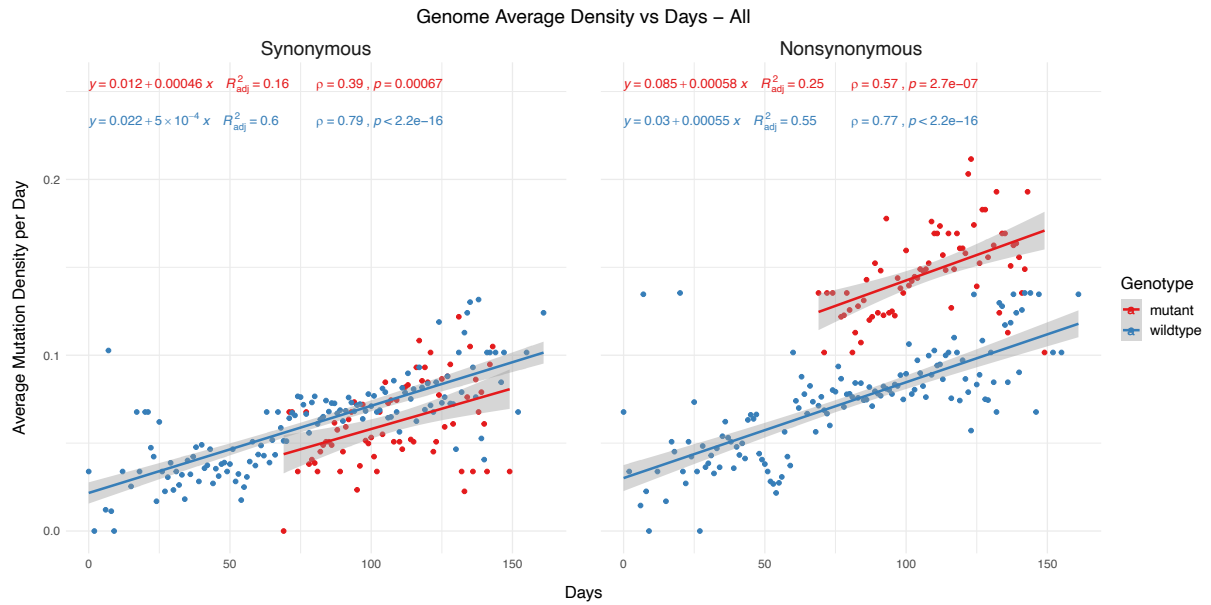

**Supplementary Figure 6. The distribution of synonymous and nonsynonymous mutations in isolates carrying 13730C>T mutation compared to wildtype isolates.**

Correlation scores are calculated using Spearman rank correlation.

## Supplementary Figure 7

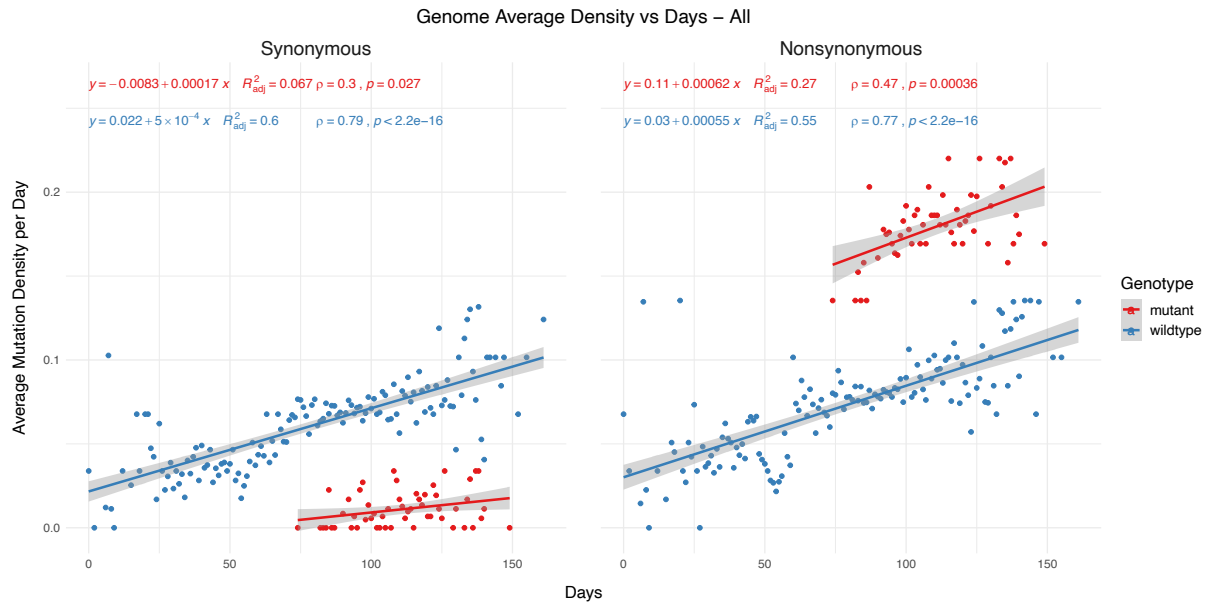

**Supplementary Figure 7. The distribution of synonymous and nonsynonymous mutations in isolates carrying 13862C>T mutation compared to wildtype isolates.**

Correlation scores are calculated using Spearman rank correlation.

## Supplementary Figure 8

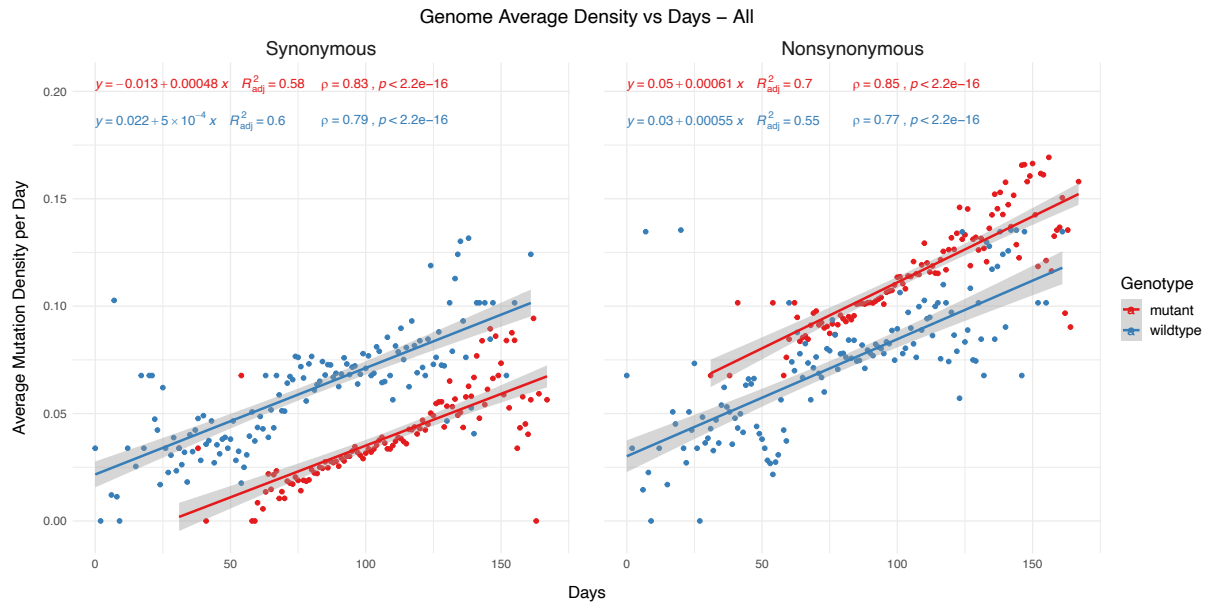

**Supplementary Figure 8. The distribution of synonymous and nonsynonymous mutations in isolates carrying 14408C>T mutation compared to wildtype isolates.**

Correlation scores are calculated using Spearman rank correlation.
